# Supplementary material for: Differential Requirement for Pten Lipid and Protein Phosphatase Activity during Zebrafish Embryonic Development
Source: PubMed Central journal article supplement (PMC4743836; doi:10.1371/journal.pone.0148508), 2016-02-05

sibling

*ptena*<sup>-/-</sup> *ptenb*<sup>-/-</sup>

NIC

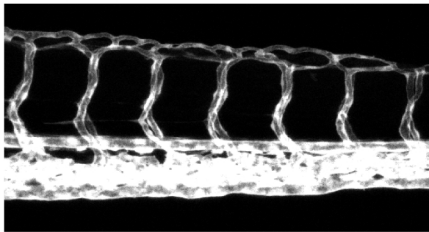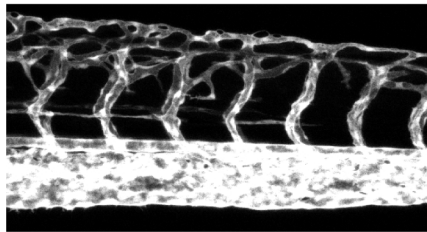G129E/Y138L  
300 pg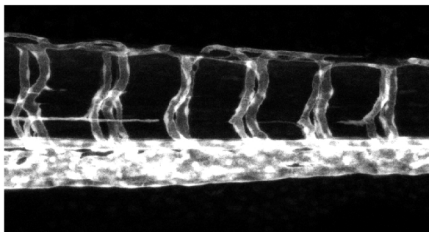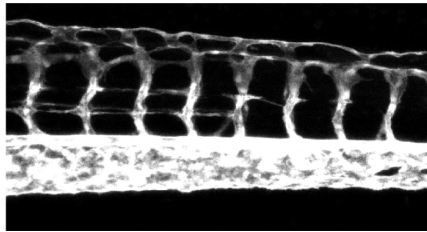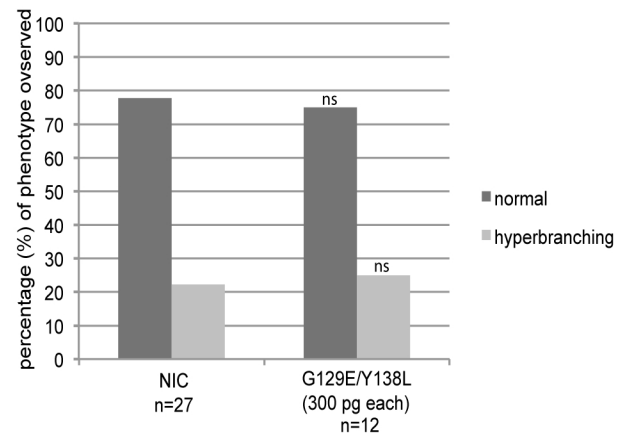

sibling

*ptena*<sup>-/-</sup> *ptenb*<sup>-/-</sup>

NIC

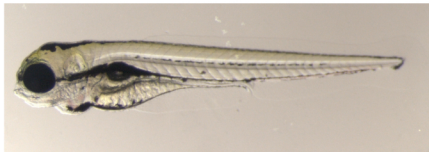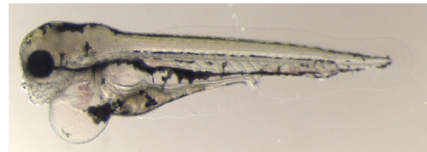G129E/Y138L  
300 pg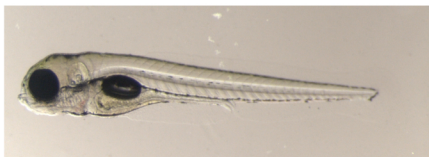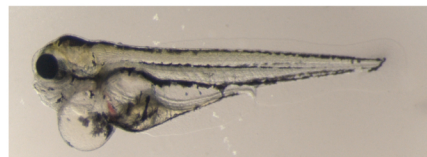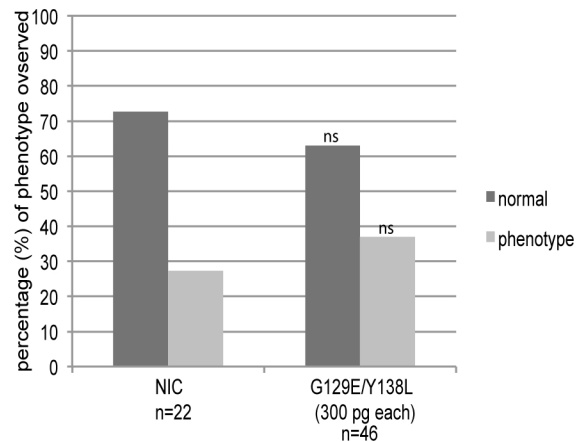

Supplement: pone.0148508.s001.pdf [file pone.0148508.s001.pdf]
